# Supplementary material for: Microfluidics-Assisted Size Tuning and Biological Evaluation of PLGA Particles
Source: Preprints.org preprint supplement (doi:10.20944/preprints201910.0027.v1), 2019-10-02
Supplement: Supplementary file 2 [file supplementary]

**Microfluidics-assisted size tuning and biological evaluation of PLGA particles**

Maria Camilla Operti,1 Yusuf Dolen,1,2 Jibbe Keulen,1 Eric A.W. van Dinther, 1,2 Carl G. Figdor,1,2 and Oya Tagit1,2ǂ

*1Department of Tumor Immunology, Radboud Institute for Molecular Life Sciences, Radboud University Medical Center, 6500 HB Nijmegen, and 2Oncode Institute, The Netherlands*

ǂ Corresponding author email: [oya.tagit@radboudumc.nl](mailto:oya.tagit@radboudumc.nl)

**Supplementary Information**

**Supp. Fig.1.** Size distribution (left) and  potential values (right) of PLGA particles encapsulating a NIR-emitting fluorescent dye.

**Supp. Fig.2.** Variations of spleen fluorescence intensities of ~100 nm (blue) and ~200 nm (green) PLGA particles obtained on isolated spleen at 24 h and 48 h after particle administration. Data obtained for untreated mice (negative control) are shown in black.
